# Supplementary material for: Clinical outcomes of prexasertib monotherapy in recurrent BRCA wild-type high-grade serous ovarian cancer involve innate and adaptive immune responses
Source: PubMed Central journal article supplement — J Immunother Cancer. 2020 Jul 23;8(2):e000516. doi: 10.1136/jitc-2019-000516 (PMC7380948; doi:10.1136/jitc-2019-000516), 2020-07-23
Supplement: jitc-2019-000516supp001.pdf [file jitc-2019-000516supp001.pdf]

**SUPPLEMENTAL MATERIAL****Supplemental Table 1. Monoclonal antibodies used for flow cytometry immune subset analysis**

| <b>Target</b> | <b>Clone</b> |
|---------------|--------------|
| CD11b         | ICRF44       |
| CD15          | W6D3         |
| CD16          | 3G8          |
| CD19          | HIB19        |
| CD25          | BC96         |
| CD3           | OKT3         |
| CD33          | WM53         |
| CD357 (GITR)  | 621          |
| CD4           | RPA-T4       |
| CD40          | 5C3          |
| CD45RA        | H100         |
| CD56          | MEM-188      |
| CD8           | SK1          |
| CTLA4         | L3D10        |
| Foxp3         | 206D         |
| HLA-DR        | L243         |
| ICOS          | C398.4A      |
| Ki67          | B56          |
| PD-1          | EH12         |
| Tim-3         | F38-2E2      |

**Supplemental Table 2. IFN- $\gamma$  and expanded immune gene signatures**

| <b>IFN-<math>\gamma</math></b> | <b>Expanded</b> |
|--------------------------------|-----------------|
| ID01                           | ID01            |
| CXCL10                         | CXCL10          |
| HLA-DRA                        | HLA-DRA         |
| STAT1                          | STAT1           |
| CXCL9                          | CD3D            |
| IFNG                           | CIITA           |
|                                | CD3E            |
|                                | CCL5            |
|                                | GZMK            |
|                                | CD2             |
|                                | CXCL13          |
|                                | IL2RG           |
|                                | NKG7            |
|                                | CXCR6           |
|                                | LAG3            |
|                                | TAGAP           |
|                                | GZMB            |
|                                | HLA-E           |

**Supplemental Table 3. Immune phenotypes and functional markers used for flow cytometry**

| Immune subset                                   | Phenotype                                                                                                                                           | Functional markers             |
|-------------------------------------------------|-----------------------------------------------------------------------------------------------------------------------------------------------------|--------------------------------|
| <b>Lymphocytes</b>                              |                                                                                                                                                     |                                |
| CD4 <sup>+</sup> T lymphocytes                  | CD4 <sup>+</sup> CD8 <sup>-</sup>                                                                                                                   | Ki67, PD1, HLA-DR, ICOSA, GITR |
| CD8 <sup>+</sup> T lymphocytes                  | CD4 <sup>-</sup> CD8 <sup>+</sup>                                                                                                                   | Ki67, PD1, HLA-DR, ICOSA, GITR |
| CD4 <sup>+</sup> Regulatory T cells             | CD4 <sup>+</sup> CD25 <sup>high</sup> Foxp3 <sup>+</sup>                                                                                            | CTLA4, TIM3                    |
| CD8 <sup>+</sup> Regulatory T cells             | CD8 <sup>+</sup> CD25 <sup>high</sup> Foxp3 <sup>+</sup>                                                                                            | CTLA4, TIM3                    |
| Effector Regulatory T cells                     | CD4 <sup>+</sup> /CD8 <sup>+</sup> CD45RA <sup>-</sup> Foxp3 <sup>high</sup>                                                                        |                                |
| Foxp3 <sup>-</sup> CD4 <sup>+</sup> T cells     | CD4 <sup>+</sup> CD8 <sup>-</sup> Foxp3 <sup>-</sup>                                                                                                | TIM3                           |
| Foxp3 <sup>-</sup> CD8 <sup>+</sup> T cells     | CD4 <sup>-</sup> CD8 <sup>+</sup> Foxp3 <sup>-</sup>                                                                                                | TIM3                           |
| Total T cell                                    | CD3 <sup>+</sup>                                                                                                                                    |                                |
| Total B cell                                    | CD19 <sup>+</sup>                                                                                                                                   |                                |
| <b>Monocytes</b>                                |                                                                                                                                                     |                                |
| Total monocytes                                 | CD14 <sup>+</sup>                                                                                                                                   | HLA-DR                         |
| Classical monocytes                             | CD14 <sup>++</sup> CD16 <sup>-</sup>                                                                                                                | HLA-DR                         |
| Intermediate monocytes                          | CD14 <sup>++</sup> CD16 <sup>+</sup>                                                                                                                | HLA-DR                         |
| Nonclassical monocytes                          | CD14 <sup>+</sup> CD16 <sup>++</sup>                                                                                                                | HLA-DR                         |
| Suppressive monocytes                           | CD14 <sup>+</sup> HLA-DR <sup>low</sup>                                                                                                             |                                |
| <b>Myeloid derived suppressor cells (MDSCs)</b> |                                                                                                                                                     |                                |
| Polymorphonuclear MDSCs                         | CD11b <sup>+</sup> CD14 <sup>-</sup> CD15 <sup>+</sup>                                                                                              |                                |
| Monocytic MDSCs                                 | CD11b <sup>+</sup> CD14 <sup>+</sup> HLA-DR <sup>-</sup><br>CD15 <sup>-</sup>                                                                       |                                |
| Early-stage MDSCs                               | CD11b <sup>+</sup> CD3 <sup>-</sup> CD14 <sup>-</sup> CD15 <sup>-</sup><br>CD19 <sup>-</sup> CD56 <sup>-</sup> HLADR <sup>-</sup> CD33 <sup>+</sup> |                                |

Abbreviations: PD1 = programmed death 1; HLA-DR = Human Leukocyte Antigen DR antigen; ICOSA = inducible T-cell costimulatory A; GITR = glucocorticoid-induced TNFR-related protein

**Supplemental Table 4. Relationship of treatment response with archival tissue tumor immune microenvironment**

| Patients with Evaluable Pre-Treatment Biopsy |          |          |         |         |                                            |                                          |                  |
|----------------------------------------------|----------|----------|---------|---------|--------------------------------------------|------------------------------------------|------------------|
|                                              | all      | PR       | SD      | PD      | Clinical Benefit<br>(PR or SD $\geq$ 6 mo) | No Clinical Benefit<br>(SD < 6 mo or PD) | <i>p</i> -value* |
| <b>Number (%)</b>                            | 23       | 7 (30%)  | 9 (39%) | 7 (30%) | 13 (57%)                                   | 10 (43%)                                 | <i>N/A</i>       |
| <b>% TIL**</b>                               | n = 21   | n = 6    | n = 9   | n = 6   | n = 12                                     | n = 9                                    |                  |
| Average % TIL                                | 20%      | 26%      | 24%     | 9%      | 56%                                        | 40%                                      | 0.2              |
| any TIL >30% (n, %)                          | 3 (14%)  | 1 (17%)  | 2 (22%) | 0       | 3 (25%)                                    | 0                                        | 0.22             |
| <b>TAM</b>                                   |          |          |         |         |                                            |                                          |                  |
| <b>Present (Score 1-3)</b>                   | 100%     | 100%     | 100%    | 100%    | 100%                                       | 100%                                     | <i>N/A</i>       |
| <b>Non-focal (Score 2-3)</b>                 | 18 (78%) | 7 (100%) | 8 (89%) | 3 (43%) | 12 (92%)                                   | 6 (60%)                                  | 0.13             |
| <b>Diffuse (Score 3)</b>                     | 3 (13%)  | 1 (14%)  | 2 (22%) | 0       | 3 (23%)                                    | 0                                        | 0.23             |
| <b>PD-L1 labeling in carcinoma</b>           |          |          |         |         |                                            |                                          |                  |
| Positive ( $\geq$ 1%)                        | 11 (48%) | 4 (36%)  | 5 (45%) | 2 (18%) | 7 (64%)                                    | 4 (36%)                                  | 0.35             |
| Negative                                     | 12 (52%) | 3 (25%)  | 4 (33%) | 5 (42%) | 6 (50%)                                    | 6 (50%)                                  |                  |

\**p*-values are based upon a comparison of patients with clinical benefit to those without.

\*\*TIL assessment was not possible in 2 cases due to lack of associated stromal tissue.

Abbreviations: n, number; *N/A*, not applicable; mo = month; PD, progressive disease; PR, partial response; SD, stable disease; TIL, tumor infiltrating lymphocytes; TAM = tumor-associated macrophage; PD-L1 = programmed death ligand

**Supplemental Figure 1. Flow cytometry gating strategies for PBMCs.** (A) Gating was done on PBMCs with doublet exclusion, then gating on viable cells, and then on subsets of CD4<sup>+</sup> or CD8<sup>+</sup> T cell populations. (B) CD8<sup>+</sup> or CD4<sup>+</sup> T cells were further gated for functional markers (PD-1, GITR, HLA-DR, ICOS or Ki-67); data shown are CD4<sup>+</sup> T cells. (C) CD4<sup>+</sup> T cells were gated for Treg (left) or for eTreg (right). (D) M-MDSC were defined as CD11b<sup>+</sup>CD14<sup>+</sup>HLA-DR<sup>-</sup>CD15<sup>-</sup>. (E) E-MDSC were defined as CD11b<sup>+</sup>CD3<sup>-</sup>CD14<sup>-</sup>CD15<sup>-</sup>CD19<sup>-</sup>CD56<sup>-</sup>HLA-DR<sup>-</sup>CD33<sup>+</sup>. (F) PMN-MDSC were defined as CD11b<sup>+</sup>CD14<sup>-</sup>CD15<sup>+</sup>. (G) Total monocytes were subdivided by CD14 and CD16 expression: classical monocytes (CD14<sup>++</sup>CD16<sup>-</sup>); non-classical monocytes (CD14<sup>+</sup>CD16<sup>++</sup>); and intermediate monocytes (CD14<sup>++</sup>CD16<sup>+</sup>).

Abbreviations: PBMCs = peripheral blood mononuclear cells; PD-1 = programmed death-1; GITR = glucocorticoid-induced TNFR-related protein; ICOS = inducible T-cell costimulatory; HLA = Human Leukocyte Antigen; Treg= regulatory T cell; eTreg = effector regulatory T cell; M-MDSC = monocytic myeloid derived suppressor cell; E-MDSCs = early-stage myeloid derived suppressor cell; PMN-MDSCs = polymorphonuclear myeloid derived suppressor cell; FSC-H = forward scatter height; FSC-A = forward scatter area; SSC = side scatter.

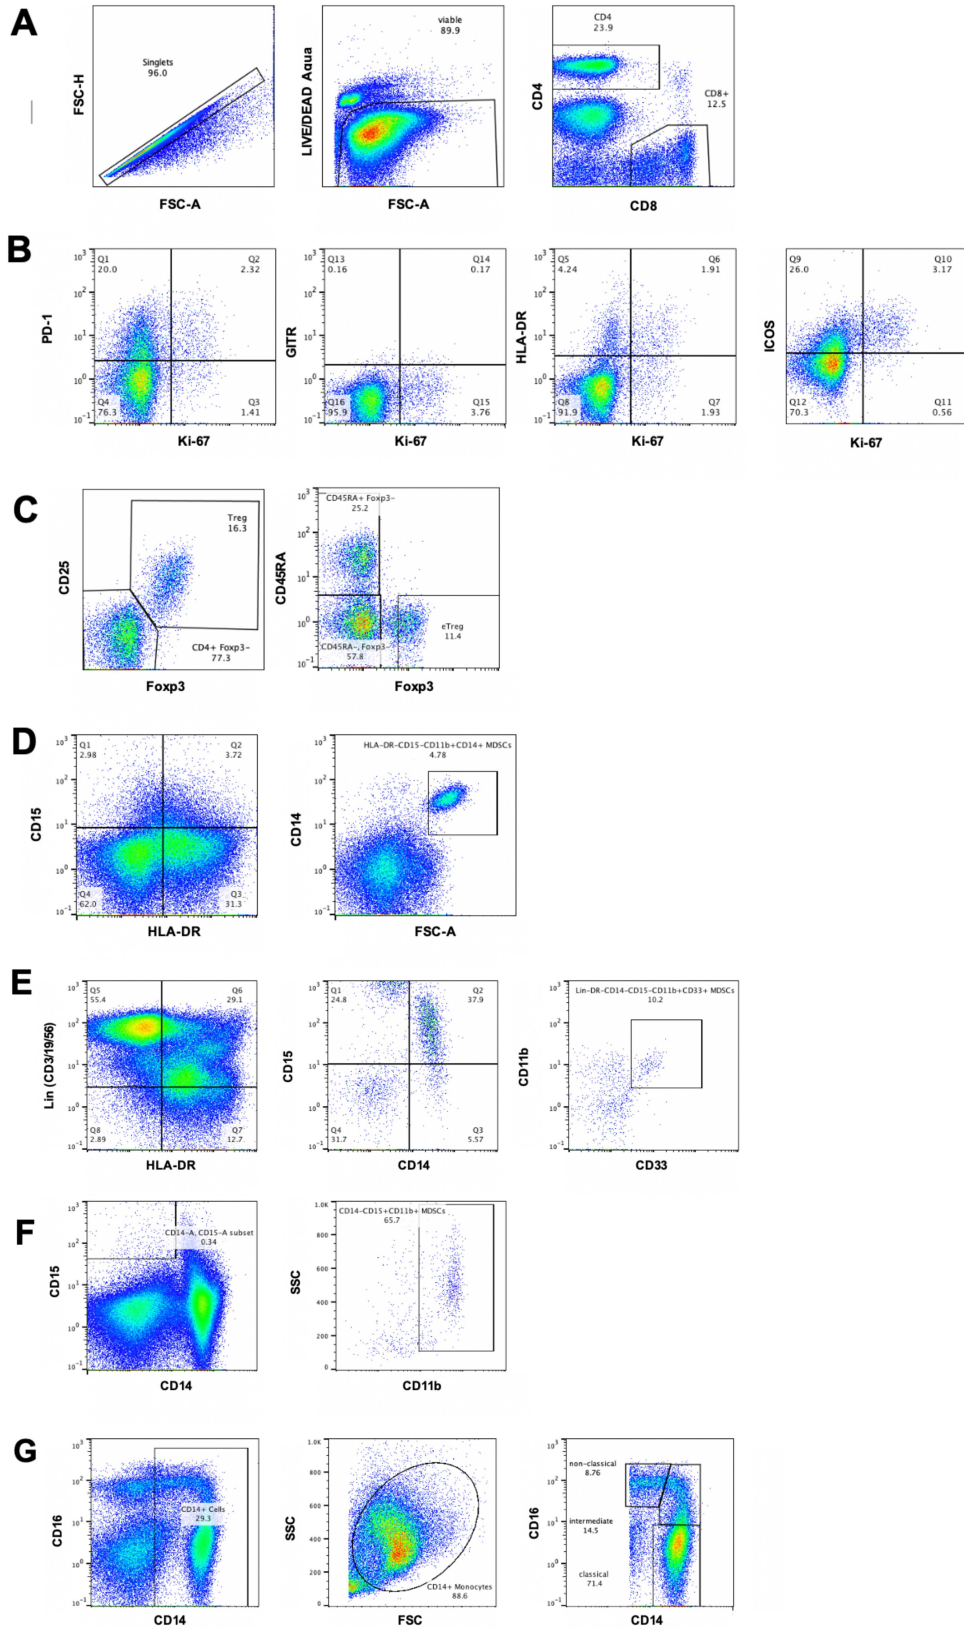

**Supplemental Figure 2. Representative image portraying PFS is longer in patients whose tumors demonstrate high TIL ( $\geq 30\%$  stromal area). Patient 33 attained a durable response with a PFS of 16.5 months; (A) her tumor demonstrated 60% stromal TIL (H&E), (B) with cytotoxic T-cells highlighted by a CD8 immunostain. Patient 48 experienced a PFS of 2 months; (C) her tumor demonstrated  $< 5\%$  stromal TIL (H&E), (D) with no demonstrable cytotoxic T-cells on a CD8 immunostain (all images, X400).**

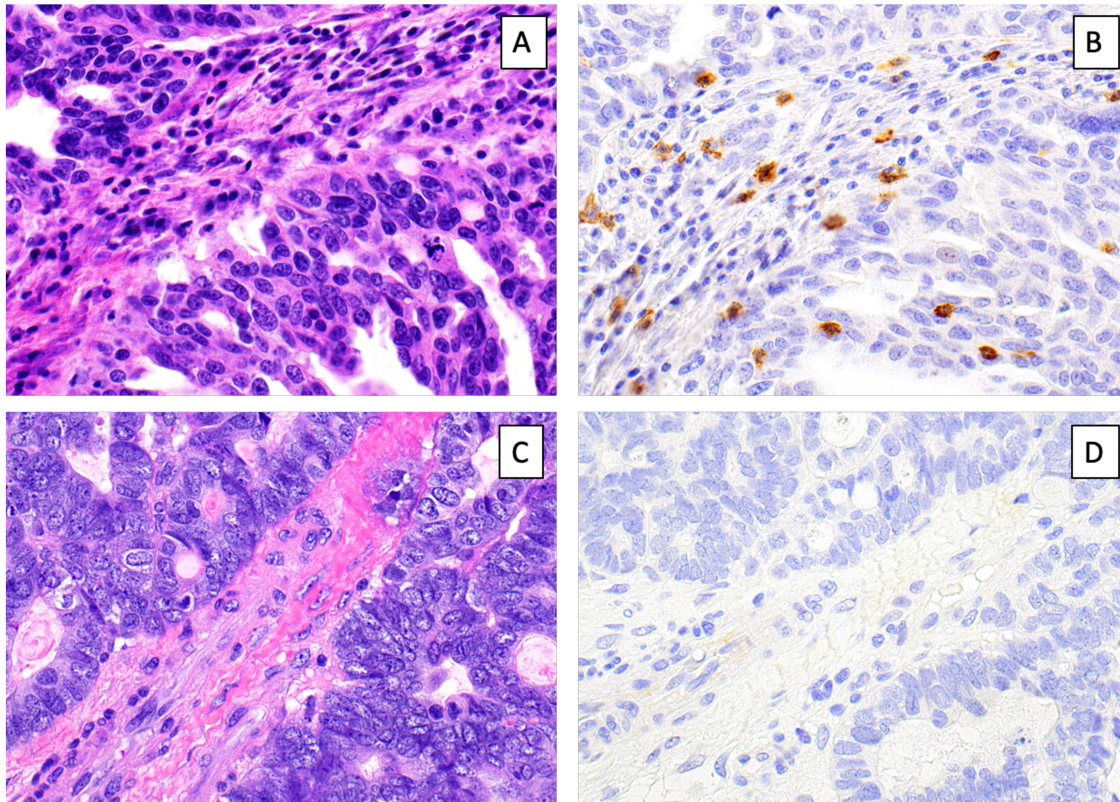

Abbreviations: PFS = progression free survival; TIL = tumor infiltrating lymphocytes; H&E = Hematoxylin and eosin.
